# Supplementary material
Source: PubMed Central journal article supplement (PMC1609232)

# **ELECTRONIC APPENDIX**

This is the Electronic Appendix to the article

DNA barcoding Australia's fish species

By

Robert D. Ward, Tyler S. Zemlak, Bronwyn H. Innes, Peter R. Last and Paul D.N.  
Hebert

*Phil. Trans. R. Soc. B* ([doi:10.1098/rstb.2005.1716](https://doi.org/10.1098/rstb.2005.1716))

Electronic appendices are refereed with the text; however, no attempt is made to impose a uniform editorial style on the electronic appendices.

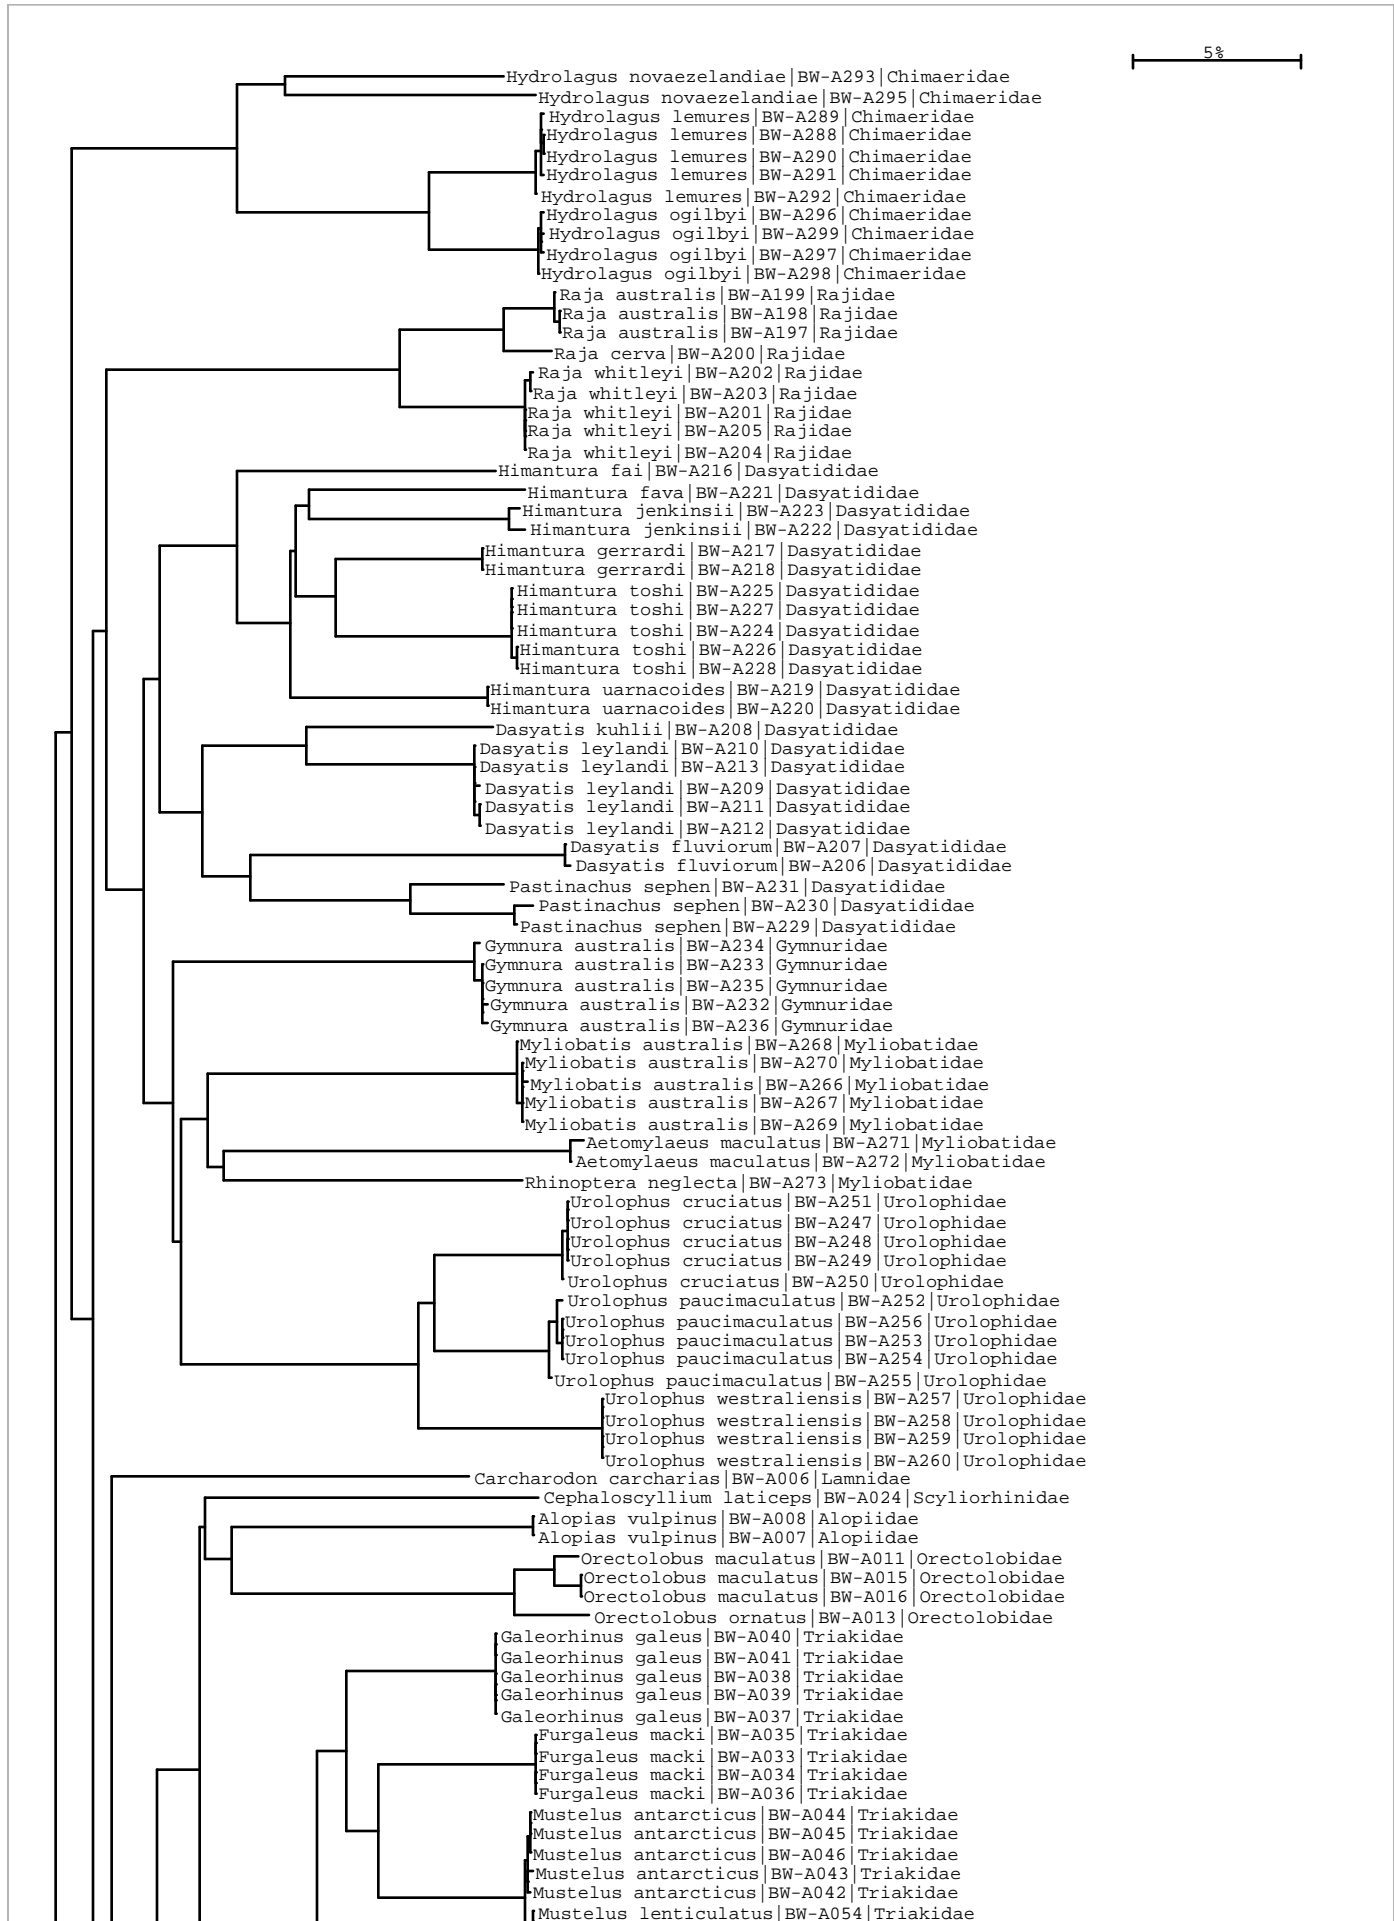

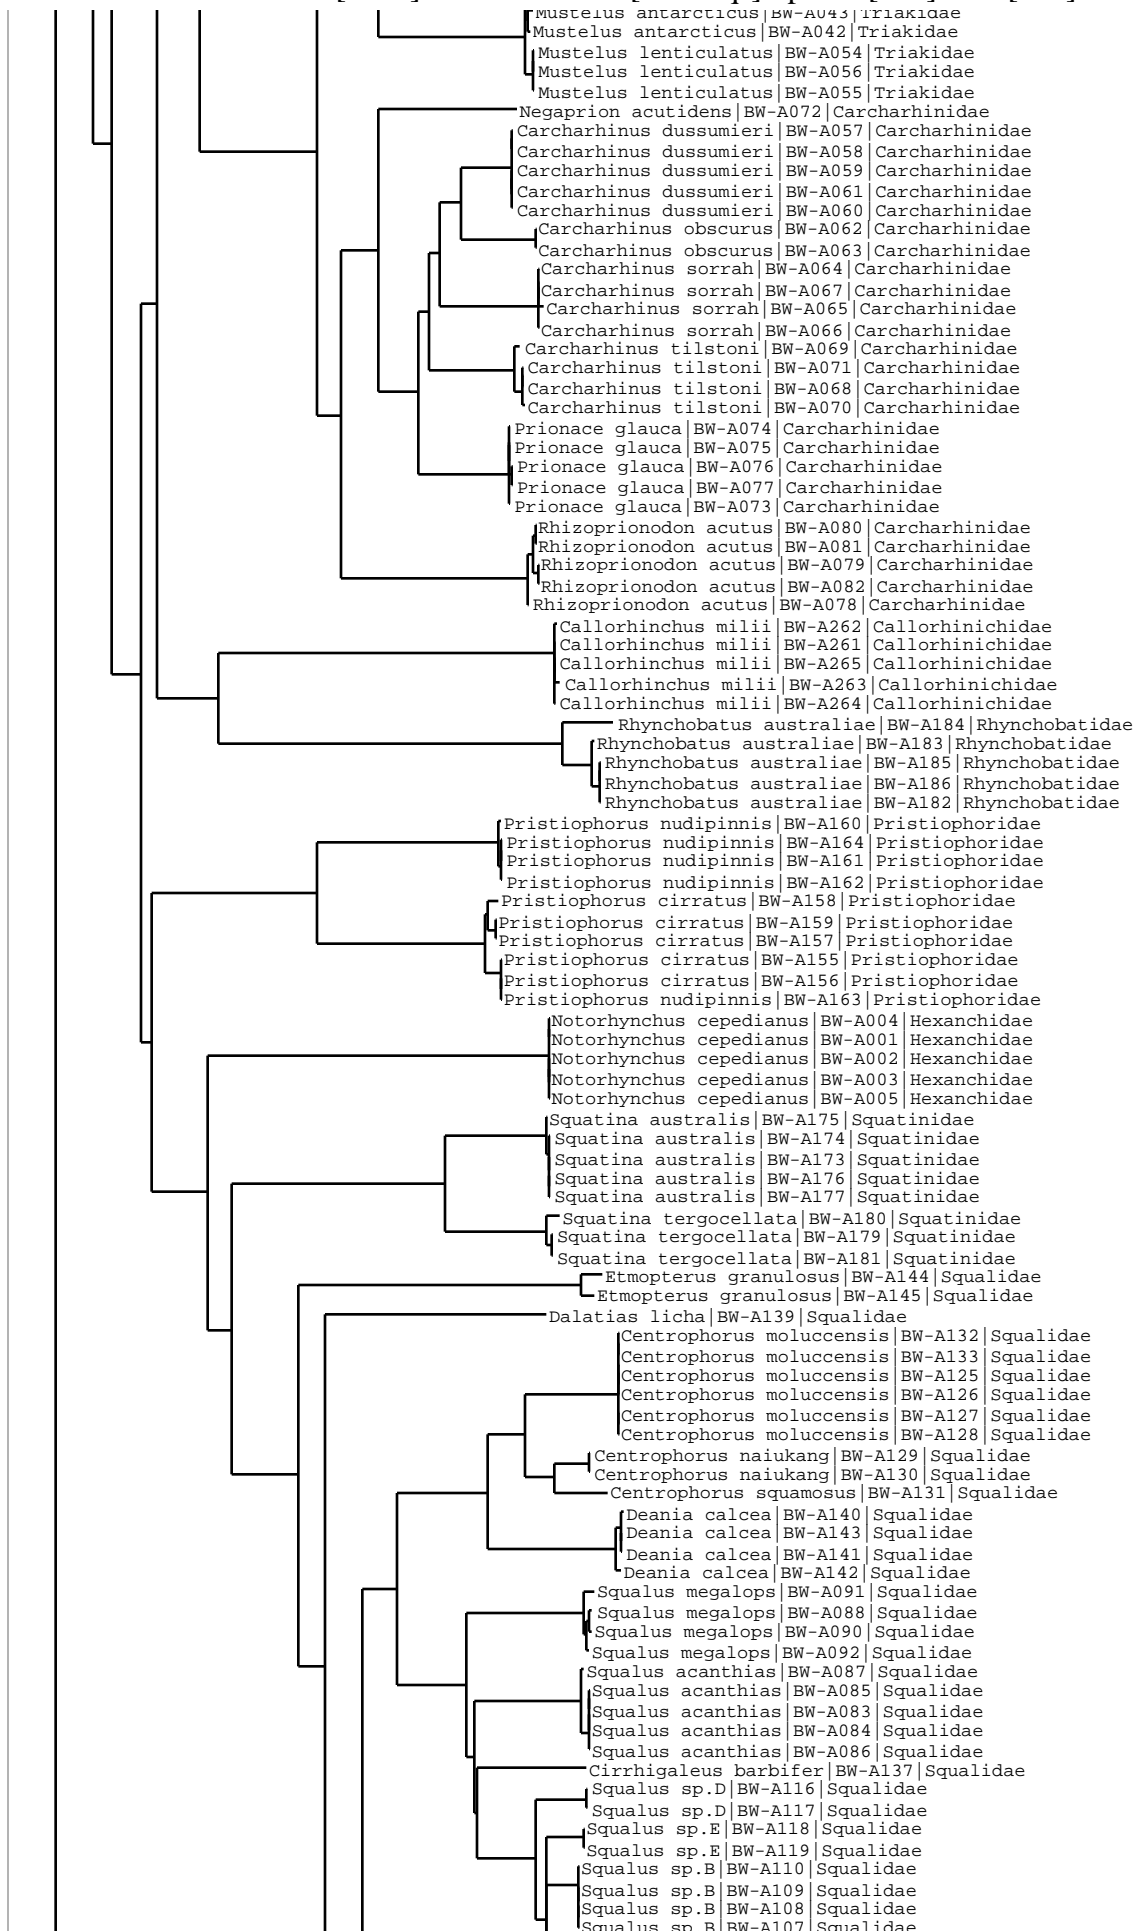

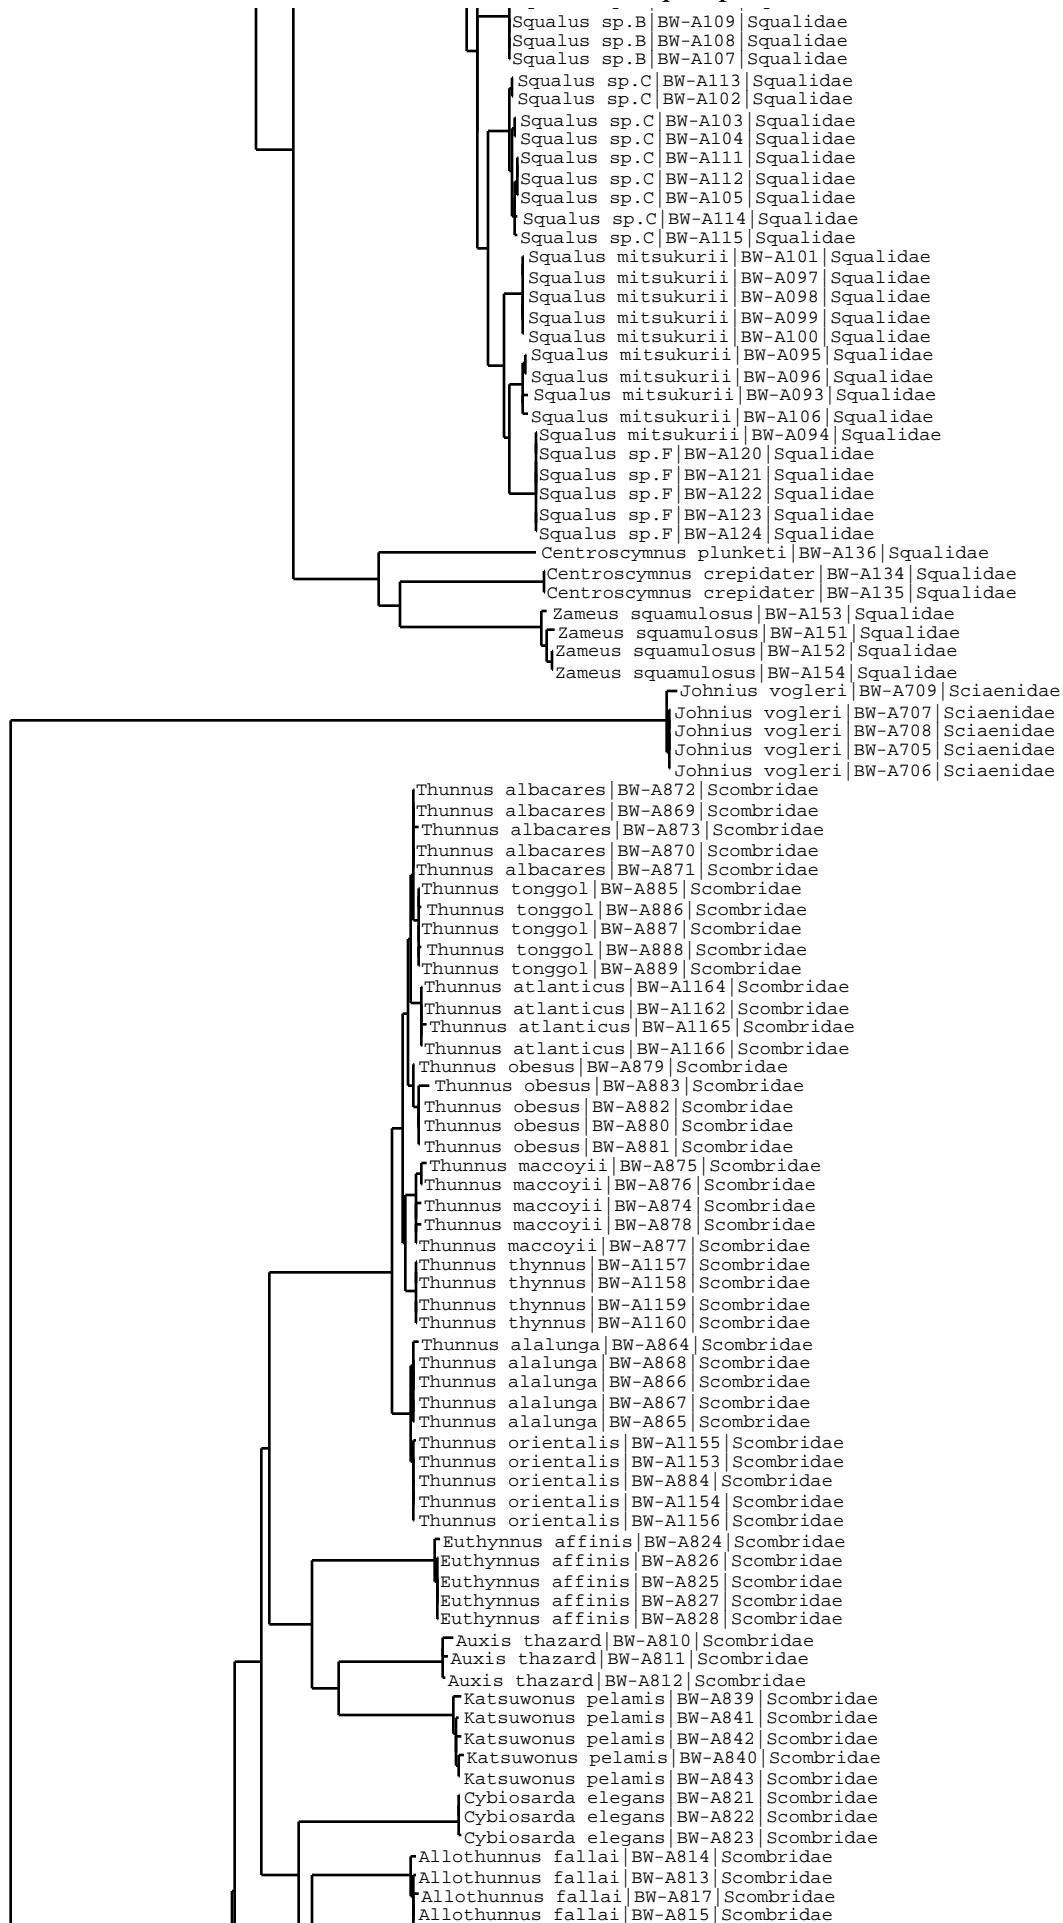

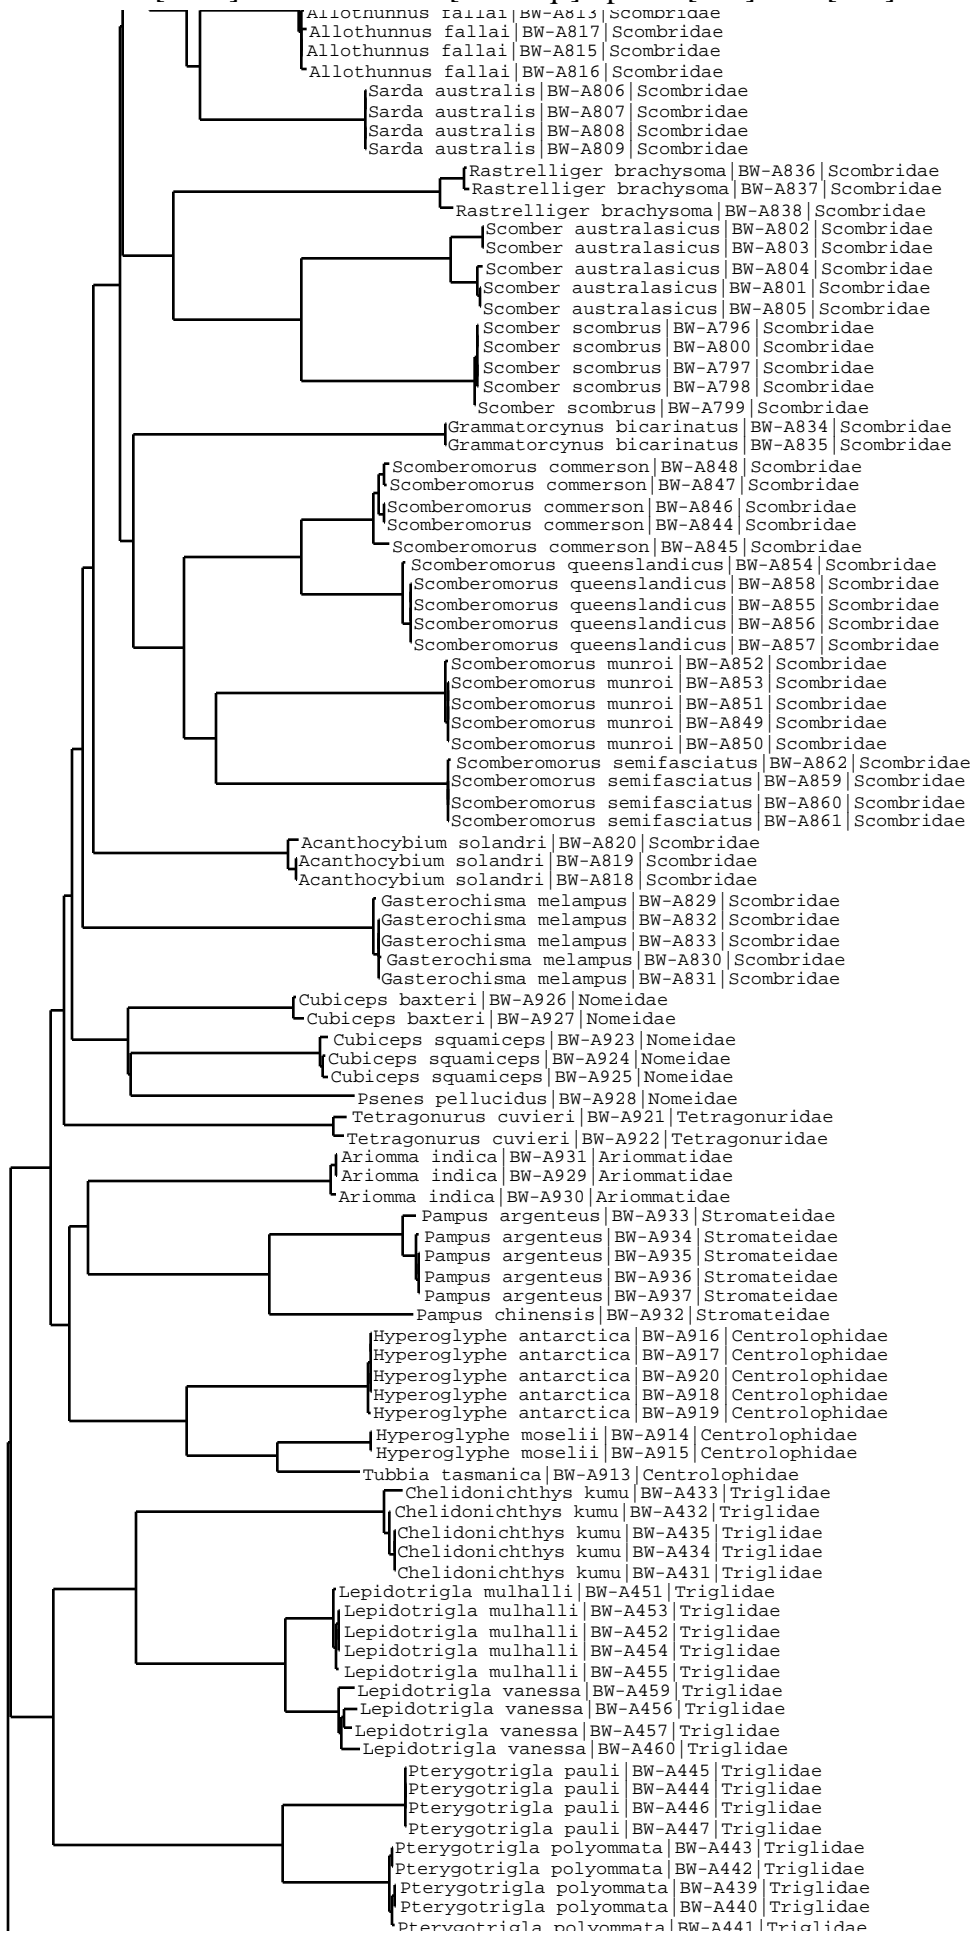

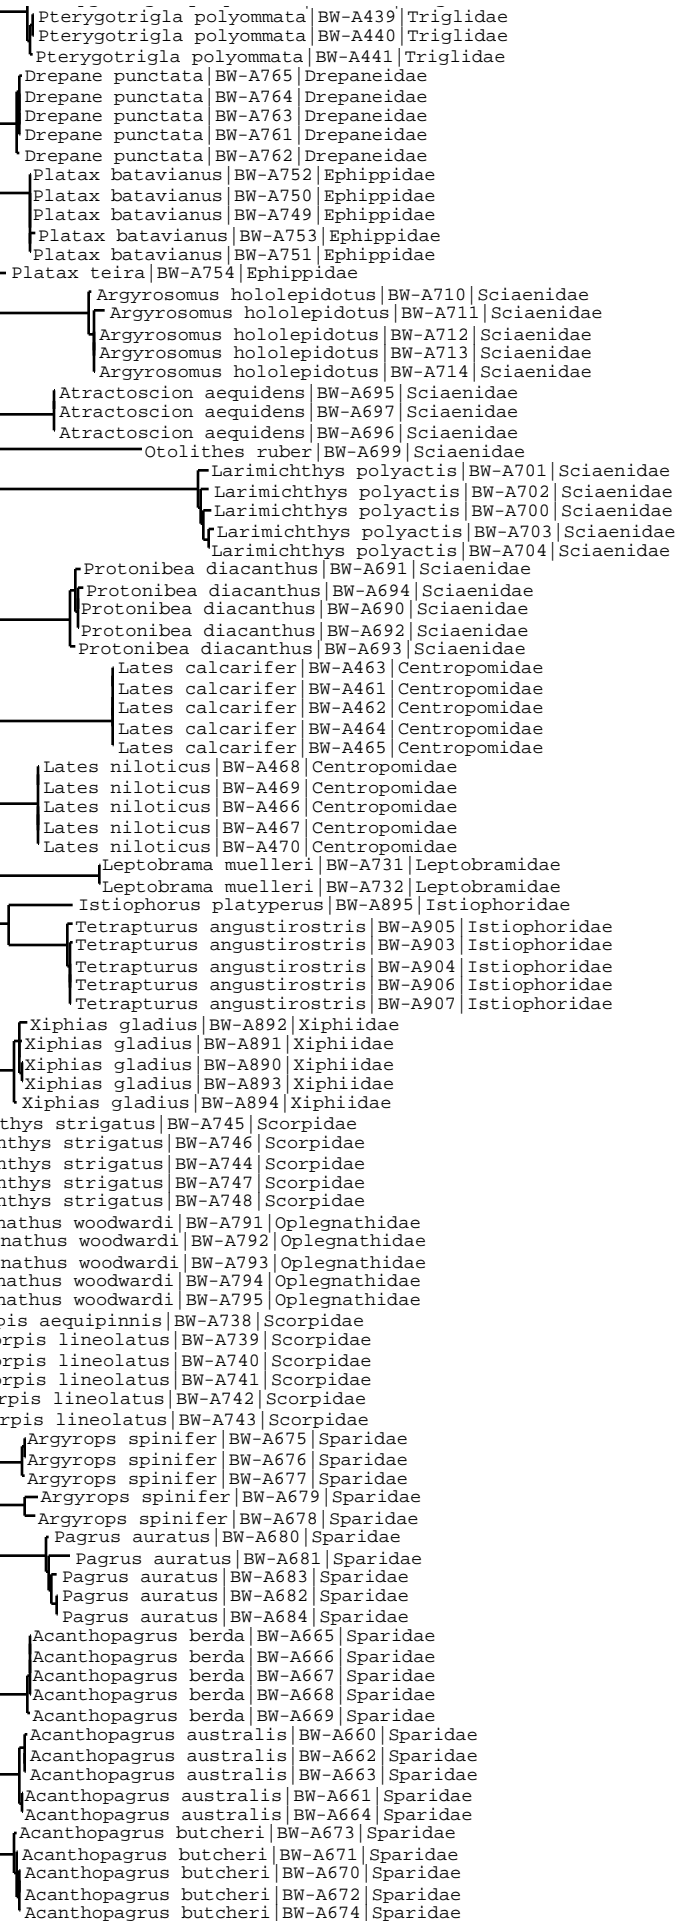

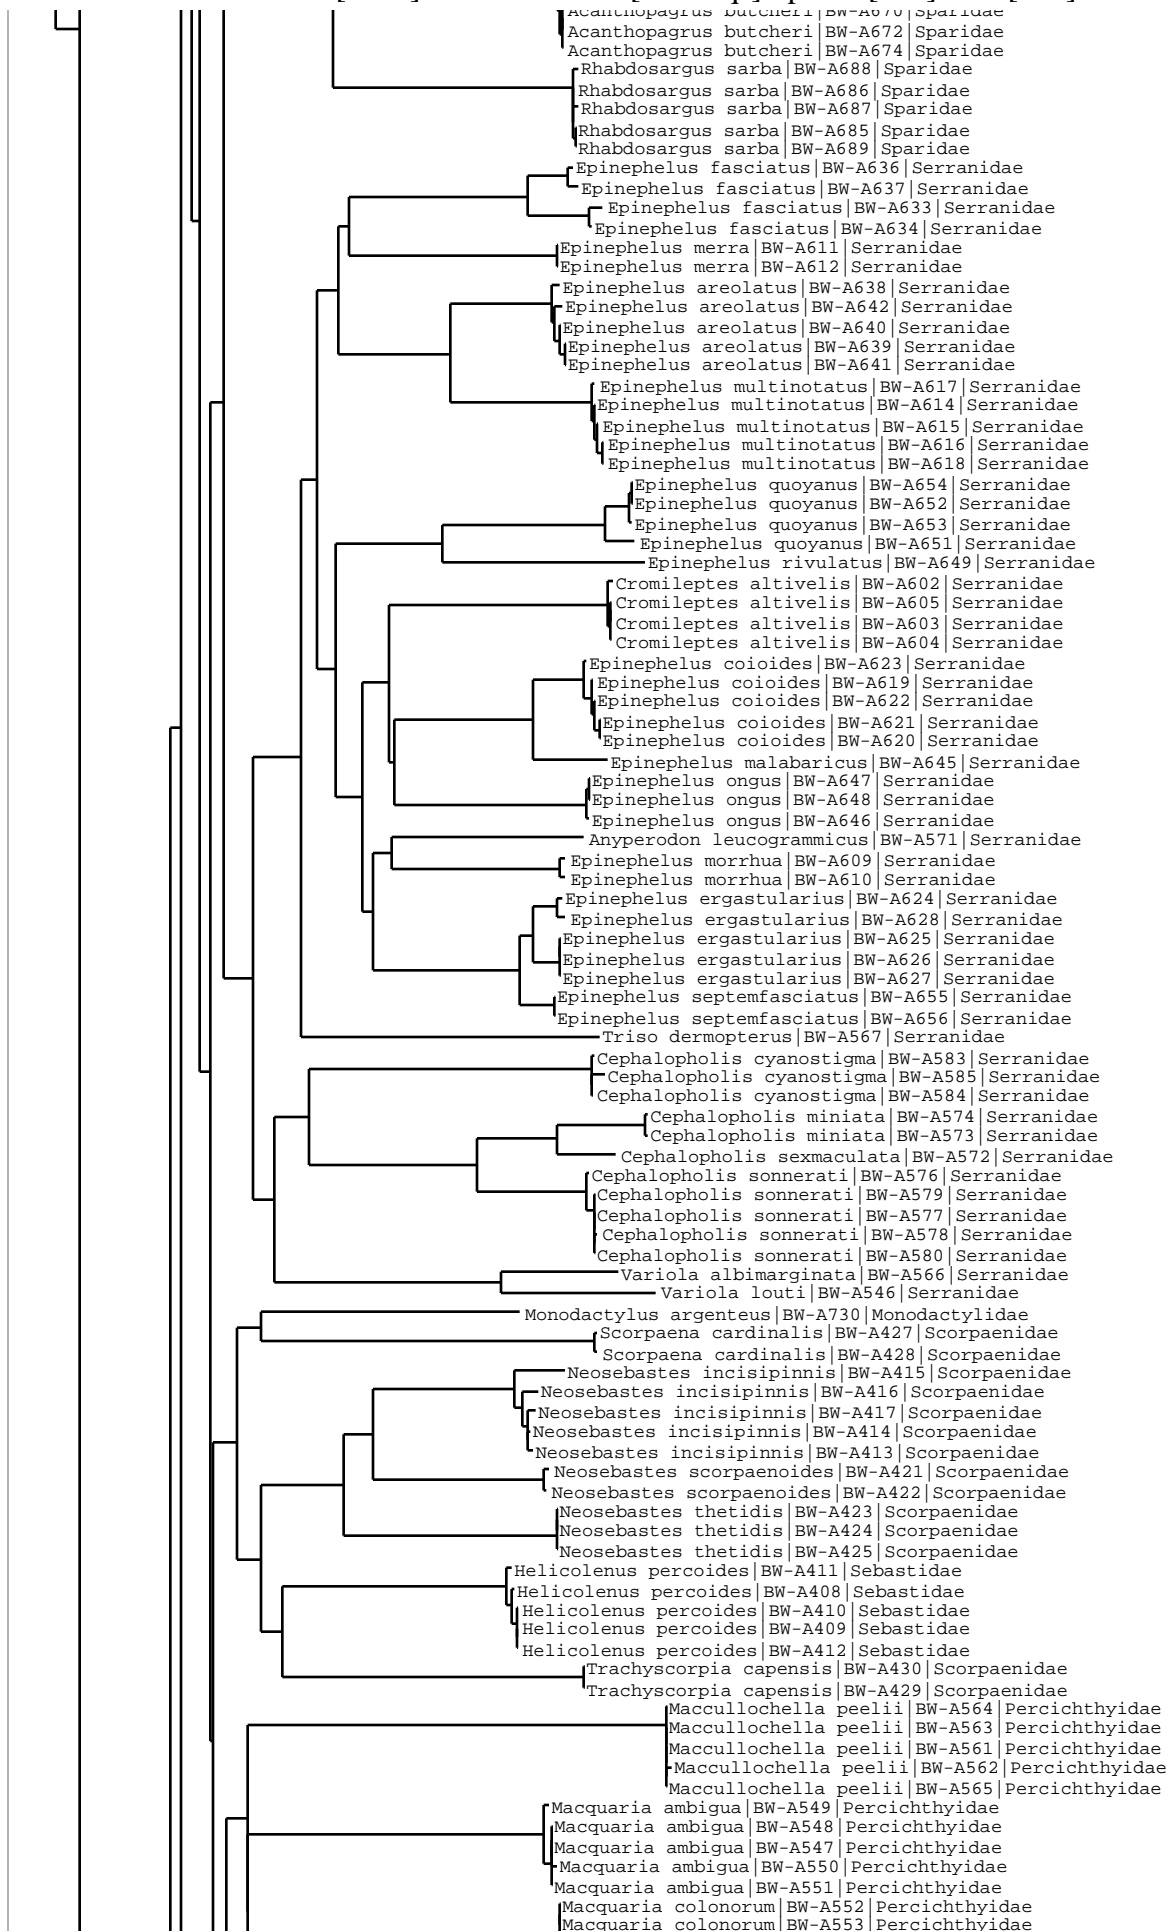

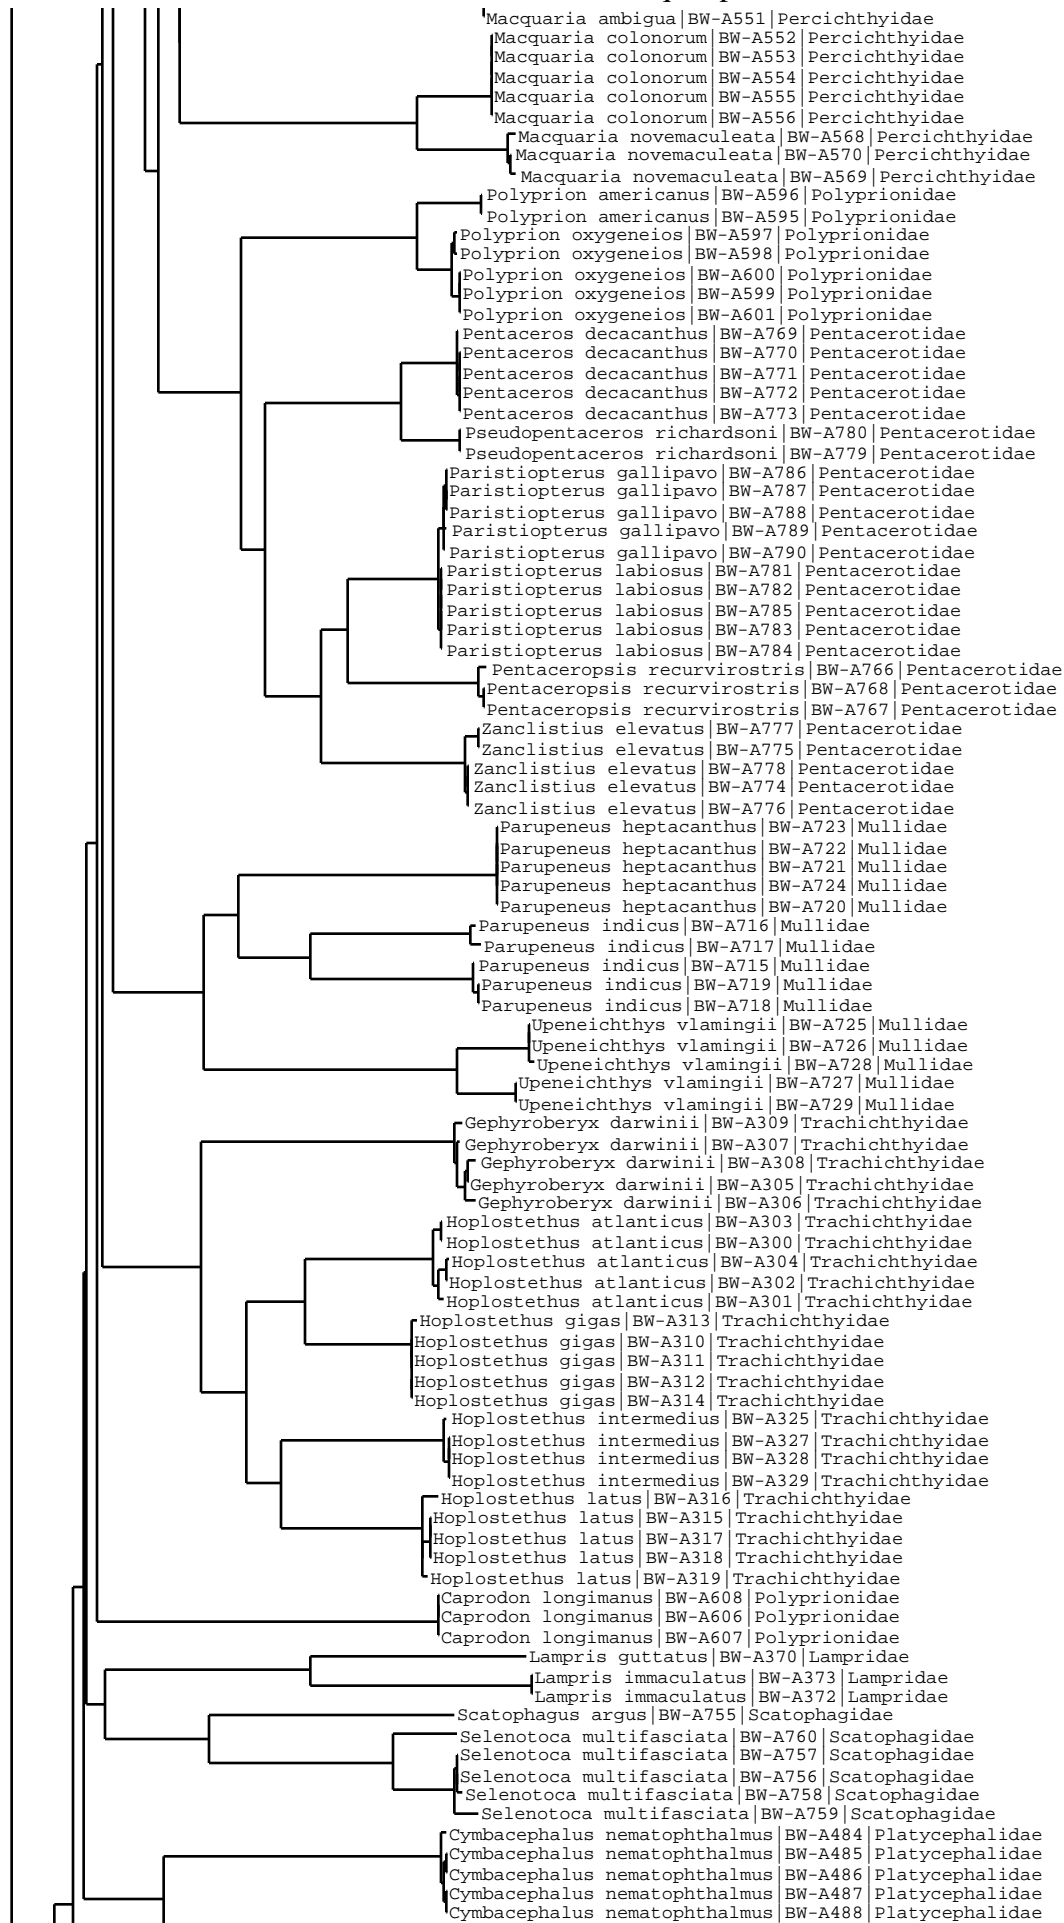



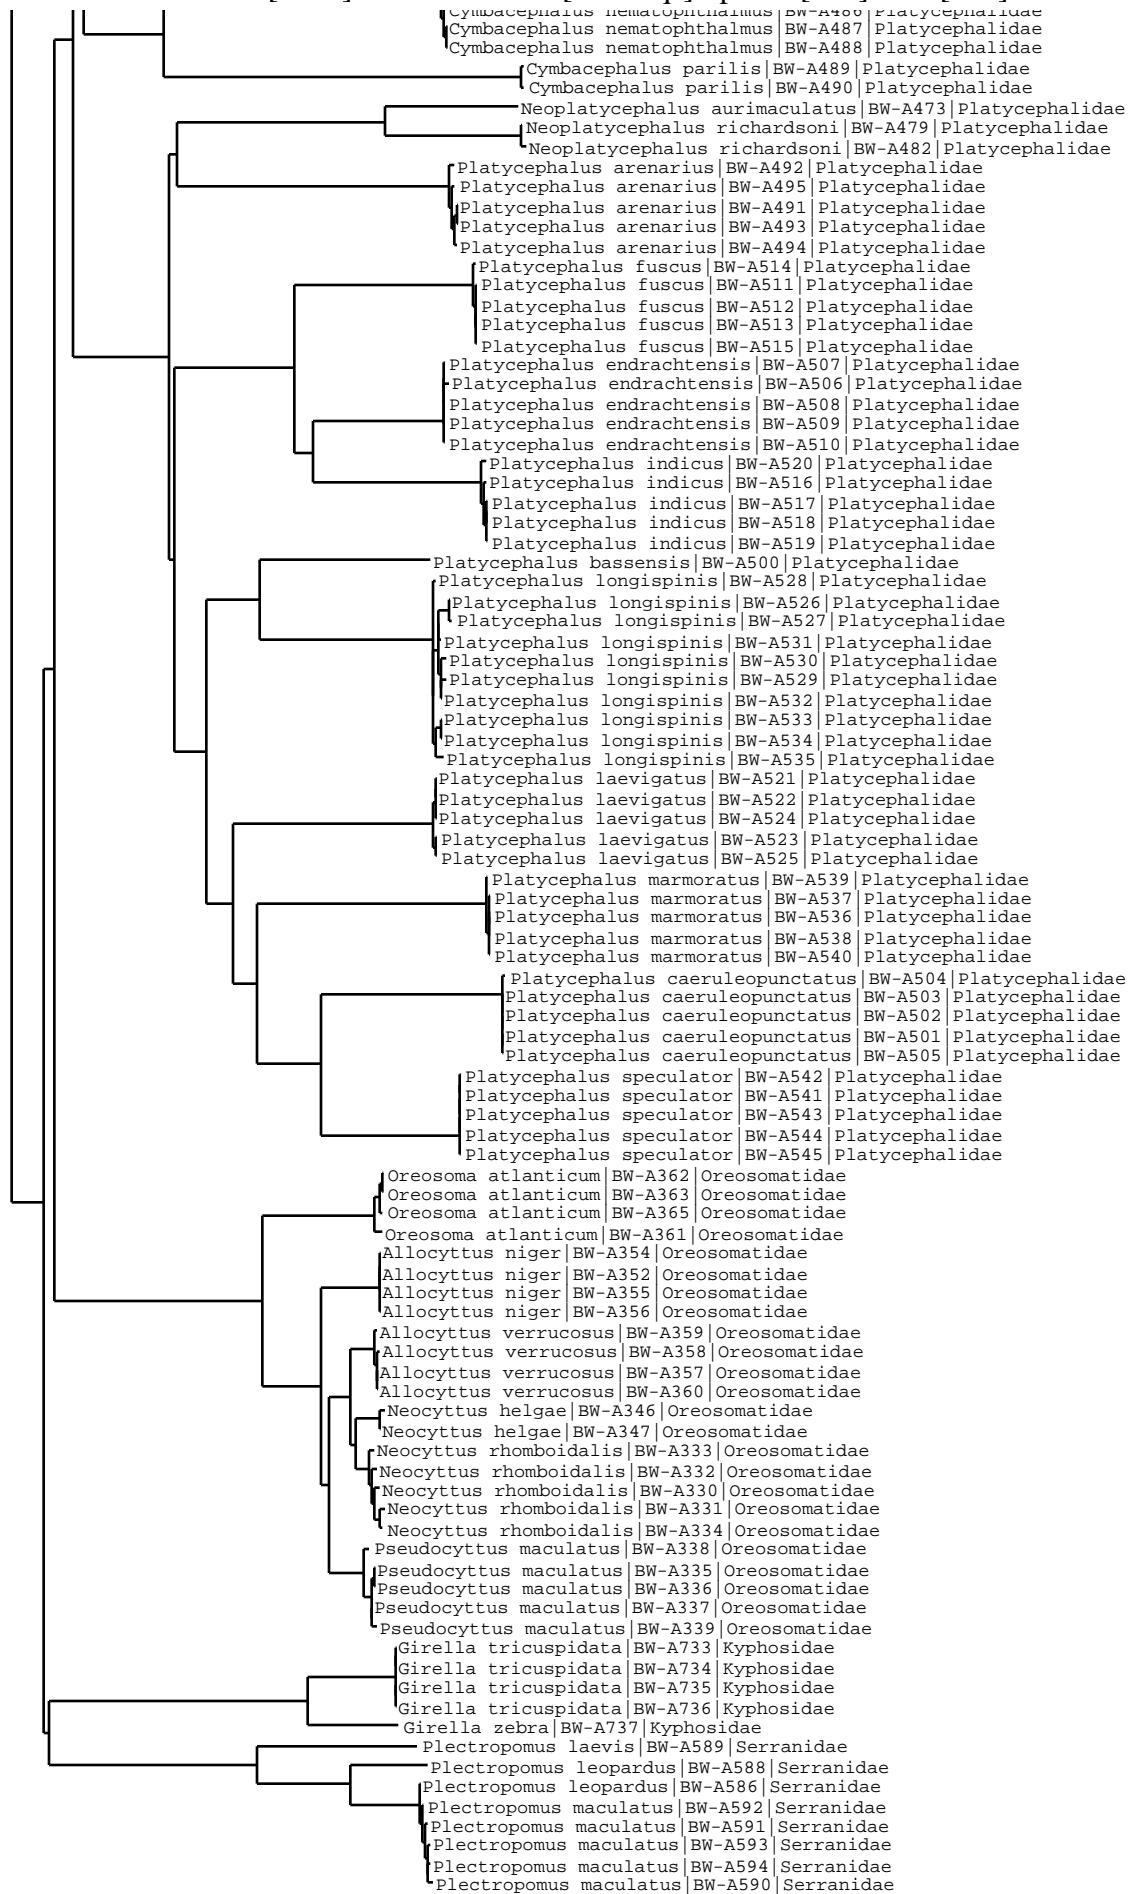

Supplement: rstb20051716s04.pdf [file rstb20051716s04.pdf]
